# Supplementary material for: Methoxyfuranocoumarins of Natural Origin–Updating Biological Activity Research and Searching for New Directions—A Review
Source: MDPI journal article supplement (doi:10.3390/cimb46010055), 2024-01-19
Supplement: s1 [file s1]

**Table S1 - IUPAC names, CAS numbers, molecular formulas and molecular weights, biological properties, mechanisms of action and experimental models studied in research of MFCs\***

| No                     | Compound / CAS No<br>Molecular formula / wt.                                                                     | IUPAC name                            | Biological activity<br>[Ref.]                                                                                                                                                                                                                                                                                                                                  | Effects                                                                                                                                                            |                                                                                                                                                                                                                                                        | Model studied                                                                                                                                                                                                                                          |
|------------------------|------------------------------------------------------------------------------------------------------------------|---------------------------------------|----------------------------------------------------------------------------------------------------------------------------------------------------------------------------------------------------------------------------------------------------------------------------------------------------------------------------------------------------------------|--------------------------------------------------------------------------------------------------------------------------------------------------------------------|--------------------------------------------------------------------------------------------------------------------------------------------------------------------------------------------------------------------------------------------------------|--------------------------------------------------------------------------------------------------------------------------------------------------------------------------------------------------------------------------------------------------------|
| PSORALENE-TYPE         |                                                                                                                  |                                       |                                                                                                                                                                                                                                                                                                                                                                | Upregulation/Stimulation                                                                                                                                           | Downregulation/Inhibition                                                                                                                                                                                                                              | Cell/Tissue/Organism                                                                                                                                                                                                                                   |
| Methoxyl group(s) only |                                                                                                                  |                                       |                                                                                                                                                                                                                                                                                                                                                                |                                                                                                                                                                    |                                                                                                                                                                                                                                                        |                                                                                                                                                                                                                                                        |
| 1                      | Bergapten<br>(5-methoxypsoralen)<br>CAS 484-20-8<br>C <sub>12</sub> H <sub>8</sub> O <sub>4</sub> / 216.189 Da   | 4-Methoxy-7H-furo[3,2-g]chromen-7-one | Antibacterial [49]<br>Antifungal [53]<br>Nematicidal [54]<br>Anti-inflammatory [56]<br>Antioxidant [61]<br>Adjuvant [19,66]*<br>Proapoptotic [17]# [69]^<br>CYP isoenzymes inhibition [70,71,72,73]<br>Tyrosinase alteration [61,74@]<br>$\alpha$ -glucosidase inhibition [60]<br>BChE inhibition [81]!<br>TAS2R10 agonist [89]                                | # apoptosis induction (caspases -8, -9, -3 activation; Bax protein expression)<br><br>@ (increase $\beta$ -catenin content, and Tyrosinase activity up to 223.7% ) | * Enhancement of inhibitory effect of 5FU<br><br># (AKT phosphorylation and downregulation of AKT/PKB; Bcl-2)<br><br>^ Cell cycle inhibition in G1 (47.3 %) after 48 h<br><br>! IC50=31 $\mu$ M (concentr. 20 $\mu$ g/mL)                              | * SMMC-7721 human hepatocellular carcinoma – in vitro<br># osteosarcoma Saos-2 (40.05 $\mu$ M)<br># colon cancer cells (HT-29 and SW620)<br>^ HL60 cells – in vitro<br><br>@ B16F10 melanoma – in vitro<br>! Ellman method                             |
| 2                      | Xanthotoxin<br>(8-methoxypsoralen)<br>CAS 298-81-7<br>C <sub>12</sub> H <sub>8</sub> O <sub>4</sub> / 216.189 Da | 9-Methoxy-7H-furo[3,2-g]chromen-7-one | Adjuvant [19]<br>Antiviral [47]<br>Antifungal [52,53]<br>Nematicidal [54]<br>Antioxidant [61]<br>Proapoptotic [16]*[69]^<br>CYP isoenzymes inhibition [70,72,73]<br>Tyrosinase alteration [61,74@]<br>Anticonvulsant [76]<br>Antidepressant [77,78]#<br>$\alpha$ -glucosidase inhibition [60]<br>TAS2R10 and 49 agonist [89]<br>TAS2R110,120,135 agonist [44]! | * apoptosis induction (caspases -8, -9, -3 activation; alteration Bax protein expression)<br><br># (NA and 5-HT level in female mice hippocampus)                  | * decreased Bcl-2 and phosphoroAkt-thr308) PI3K/AKT<br><br>^ Cell cycle inhibition in G1 (44.2 %) after 48 h<br><br># (12 mg/kg and 15mg/kg – decreasing depressive-like behavior in male mice)<br><br>! G $\beta$ $\gamma$ -PLC $\beta$ 2/IP3 pathway | * neuroblastoma cells: SK-N-AS (IC50=56.3 $\mu$ M)<br>* colon cancer cells: SW620 (IC50=88.5 $\mu$ M) - in vitro<br><br>^ HL60 cells - in vitro<br><br># Male and female Swiss mice - in vivo<br># B16F10 melanoma – in vitro<br>! HL-1 cardiomyocytes |

|                               |                                                                                                                                    |                                                       |                                                                                                                                                                                                                                                                                                                                                               |                                                                                     |                                                                                                                               |                                                                                                                   |
|-------------------------------|------------------------------------------------------------------------------------------------------------------------------------|-------------------------------------------------------|---------------------------------------------------------------------------------------------------------------------------------------------------------------------------------------------------------------------------------------------------------------------------------------------------------------------------------------------------------------|-------------------------------------------------------------------------------------|-------------------------------------------------------------------------------------------------------------------------------|-------------------------------------------------------------------------------------------------------------------|
| 3                             | 5-methoxy-8-hydroxypsoralen<br>(8-hydroxybergapten)<br>CAS 1603-47-0<br>C <sub>12</sub> H <sub>8</sub> O <sub>5</sub> / 232.189 Da | 9-Hydroxy-4-methoxyfuro[3,2-g]chromen-7-one           | Antioxidant [62]^<br>Anti-proliferative [62]*                                                                                                                                                                                                                                                                                                                 | -                                                                                   | ^ moderate DPPH scav. act.<br>^ strong ABTS** scav. act.<br><br>* (IC <sub>50</sub> = 7.46 μM<br>IC <sub>50</sub> = 13.48 μM) | ^ EC <sub>50</sub> = 45.24 μM<br>^ EC <sub>50</sub> = 17.86 μM<br><br>* (HepG2 cells<br>HeLa cells)<br>– in vitro |
| 4                             | Isopimpinellin<br>(5,8-dimethoxypsoralen)<br>CAS 482-27-9<br>C <sub>13</sub> H <sub>10</sub> O <sub>5</sub> / 246.215 Da           | 4,9-Dimethoxy-7H-furo[3,2-g]chromen-7-one             | Adjuvant [19,50]<br>Antibacterial [50, 51]<br>Antifungal [52,53]<br>Nematicidal [54]<br>Anti-inflammatory [55]# [56]<br>[56] *<br>Adjuvant [50]<br>Anticonvulsant [65]^<br>CYP isoenz. inhib. [71,72,73]<br>Tyrosinase alteration [61,74@]<br>α-glucosidase inhibition [60]<br>Anti-amyloid-β activity [82]<br>Hemostatic [85]<br>TAS2R10 and 14 agonist [89] | * (NF-κB)<br><br>^ (additive anticonvulsant effects of phenobarbital and valproate) | # ( PI3K inhibition<br>AKT phosphorylation)<br><br>* (TNFα; IL-1β; IL-4)                                                      | * (RBL-2H3 cells)<br>– in vitro<br>^ (mouse MES model)<br>– in-vivo<br><br>@ B16F10 melanoma<br>– in vitro        |
| 5                             | Halfordin<br>(3,4,5-trimethoxypsoralen)<br>CAS 18646-71-4<br>C <sub>14</sub> H <sub>12</sub> O <sub>6</sub> / 276.241 Da           | 4,5,6-Trimethoxy-7h-furo[3,2-g]chromen-7-one          | Antioxidant [62]*<br>α-amylase inhibition [63]@<br>Antiseizure [21]#                                                                                                                                                                                                                                                                                          | # upregulation of <i>penca</i> gene                                                 | * 88.84 % inhibition<br>@ IC <sub>50</sub> =197.53 μM<br>(= 54.53 μg/mL)                                                      | * β-carotene bleaching assay [% of inhibition]                                                                    |
| Methoxyl and isopropyl groups |                                                                                                                                    |                                                       | Biological activity [Ref.]                                                                                                                                                                                                                                                                                                                                    | Upregulation/Stimulation                                                            | Downregulation/Inhibition                                                                                                     | Cell/Tissue/AOrganism                                                                                             |
| 6                             | Peucedanin<br>(oreoselone methyl ether)<br>CAS 133-26-6<br>C <sub>15</sub> H <sub>14</sub> O <sub>4</sub> / 258.269 Da             | 2-Isopropyl-3-methoxy-7H-furo[3,2-g]chromen-7-one     | Proapoptotic [69]                                                                                                                                                                                                                                                                                                                                             | Apoptosis induction                                                                 | Cell cycle inhibition in G1;<br>69.1 % after 24 h<br>58.6 % after 48 h<br>(concentr. 100 μg/mL)                               | HL60 cells<br>PBL cells<br>– in vitro                                                                             |
| 7                             | 8-Methoxypeucedanin<br>CAS 76520-50-8<br>C <sub>16</sub> H <sub>16</sub> O <sub>5</sub> / 288.295 Da                               | 2-Isopropyl-3,8-dimethoxy-7H-furo[3,2-g]chromen-7-one | Proapoptotic [69]                                                                                                                                                                                                                                                                                                                                             | Apoptosis induction                                                                 | Cell cycle inhibition in G1;<br>66.1 % after 24 h<br>51.9 % after 48 h<br>(concentr. 100 μg/mL)                               | HL60 cells<br>PBL cells<br>– in vitro                                                                             |

| Methoxyl and prenyl groups |                                                                                                                                          |                                                                                                                   | Biological activity<br>[Ref.]                                                                                                                                                                                                                                                                                                                                              | Upregulation/Stimulation                                                                   | Downregulation/Inhibition                                                                                                                                                                                                                                                     | Cell/Tissue/AOrganism                                                                                                                                                                                                     |
|----------------------------|------------------------------------------------------------------------------------------------------------------------------------------|-------------------------------------------------------------------------------------------------------------------|----------------------------------------------------------------------------------------------------------------------------------------------------------------------------------------------------------------------------------------------------------------------------------------------------------------------------------------------------------------------------|--------------------------------------------------------------------------------------------|-------------------------------------------------------------------------------------------------------------------------------------------------------------------------------------------------------------------------------------------------------------------------------|---------------------------------------------------------------------------------------------------------------------------------------------------------------------------------------------------------------------------|
| 8                          | Phellopterin<br>(5-methoxyimperatorin)<br>CAS 2543-94-4<br>C <sub>17</sub> H <sub>16</sub> O <sub>5</sub> / 300.306 Da                   | 4-Methoxy-9-[(3-methyl-2-buten-1-yl)oxy]-7H-furo[3,2-g]chromen-7-one                                              | Antiviral [45, 47]<br>Antibacterial [49]<br>Antibacterial [50]<br>Anti-inflammatory [58]^ [59]*<br>Adjuvant [64]# [50]&<br>Anti-proliferative [62]\$<br>CYP isoenzyme inhib. [70,71]<br>Insulin sensitivity alteration [75]@<br>Lowering blood glucose [75]<br>Lowering blood lipids [75]<br>Anti-amyloid-β activity [82]<br>Neuroprotective [82]<br>Anti-adipogenic [84]! | * (SIRT1 protein)<br><br>@ (mRNA expression of PPARγ; adipocyte differentiation promotion) | ^ (IgE)<br>* (ICAM-1 and INF-γ)<br><br>#(P-glycoprotein inhibition; IC50 = 32 µg/mL)<br><br>\$ (IC50 = 7.49 µM)<br>@ 3T3-L1 preadipocyte cells<br><br>! Downregulation;<br>- adipocyte-specific protein<br>- fatty acids binding proteins<br>- lipoprotein lipase<br>- leptin | ^ HaCaT in vitro,<br>C57BL/6 male mice<br>- in vivo<br>* (C57BL/6J mice)<br># SA1199B and SA-K2191 ( <i>S. aureus</i> with NorA and MrsA efflux proteins)<br>\$ (HepG2 cells)<br>@ (3Ts-L1 preadipocyte cells) – in vitro |
| 9                          | Cnidilin<br>(Isophellopterin = 8-methoxyisoimperatorin)<br>CAS 14348-22-2<br>C <sub>17</sub> H <sub>16</sub> O <sub>5</sub> / 300.306 Da | 5-(Isopentenyl-oxy)-8-methoxypsoralen; 9-Methoxy-4-[(3-methyl-2-buten-1-yl)oxy]-7H-furo[3,2-g][1]benzopyran-7-one | Tyrosinase inhibition [61]                                                                                                                                                                                                                                                                                                                                                 | -                                                                                          | Inhibition less than 5%                                                                                                                                                                                                                                                       | -                                                                                                                                                                                                                         |
| 10                         | Apaensin<br>(8-methoxypabulenol)<br>CAS<br>C <sub>17</sub> H <sub>16</sub> O <sub>5</sub> / 319.281 Da                                   | 4-[(2S)-2-Hydroxy-3-methyl-3-buten-1-yl]oxy}-8-methoxy-7H-furo[3,2-g]chromen-7-one                                | Proapoptotic [68]                                                                                                                                                                                                                                                                                                                                                          | Nur77 receptor and JNK and p38 (MAPK) (Nur77-Bcl-2 activation) Bax                         | -                                                                                                                                                                                                                                                                             | NIH-H460 lung cancer cells – in vitro                                                                                                                                                                                     |
| 11                         | Byakangelicin<br>CAS 19573-01-4<br>C <sub>17</sub> H <sub>18</sub> O <sub>7</sub> / 334.32 Da                                            | 9-(2,3-Dihydroxy-3-methylbutoxy)-4-methoxy-7H-furo[3,2-g][1]benzopyran-7-one                                      | Anti-inflammatory [56] *<br>Adjuvant [67]^                                                                                                                                                                                                                                                                                                                                 | * (NF-κB)                                                                                  | * (TNFα; IL-1β; IL-4)<br><br>^ (TNFα; IL-1β)                                                                                                                                                                                                                                  | * basophilic leukaemia RBL-2H cells – in vitro<br>^ LPS-induced neuro-inflammation model in vivo (B57/BL6 mice)                                                                                                           |
| 12                         | Byakangelicol<br>CAS 61046-59-1<br>C <sub>17</sub> H <sub>16</sub> O <sub>6</sub> / 316.31 Da                                            | 9-(3,3-Dimethyl-2-oxiranyl)methoxy]-4-methoxy-7H-furo[3,2-g][1]benzopyran-7-one                                   | Anti-inflammatory [56] *<br>Tyrosinase inhibition [61]                                                                                                                                                                                                                                                                                                                     | * (NF-κB)                                                                                  | * (TNFα; IL-1β; IL-4)                                                                                                                                                                                                                                                         | * basophilic leukaemia RBL-2H cells<br>- in vitro                                                                                                                                                                         |

| ANGELICIN-TYPE       |                                                                                                                     |                                                                                                                                      | Biological activity<br>[Ref.]                                                                                                                                                              | Upregulation/Stimulation | Downregulation/Inhibition                                                                                                                                 | Cell/Tissue/Organism                                  |
|----------------------|---------------------------------------------------------------------------------------------------------------------|--------------------------------------------------------------------------------------------------------------------------------------|--------------------------------------------------------------------------------------------------------------------------------------------------------------------------------------------|--------------------------|-----------------------------------------------------------------------------------------------------------------------------------------------------------|-------------------------------------------------------|
| Methoxyl groups only |                                                                                                                     |                                                                                                                                      |                                                                                                                                                                                            |                          |                                                                                                                                                           |                                                       |
| 13                   | Isobergapten<br>CAS 482-48-4<br>C <sub>12</sub> H <sub>8</sub> O <sub>4</sub> / 216.189 Da                          | 5-Methoxy-2H-furo[2,3-h]chromen-2-one                                                                                                | $\alpha$ -glucosidase inhibition [60]*<br>AChE inhibition [80#, 83@]                                                                                                                       | -                        | * weak inhibition<br># IC <sub>50</sub> = 18.1 $\mu$ M<br>@ IC <sub>50</sub> = 0.796 $\mu$ M<br>(= 172.1 $\mu$ g/mL)                                      | #, @ Ellman method                                    |
| 14                   | Sphondin<br>CAS 483-66-9<br>C <sub>12</sub> H <sub>8</sub> O <sub>4</sub> / 216.189 Da                              | 6-Methoxy-2H-furo[2,3-h]chromen-2-one                                                                                                | Antiviral [48]*<br>Antifungal [53]#<br>$\alpha$ -glucosidase inhibition [60]                                                                                                               | -                        | * Degradation of HBx hepatitis B protein<br>* Inhibition of expression hepatitis B surface antigen (HBsAg)                                                | * HepG2 cells<br>* mouse model<br><br># Fungi, yeasts |
| 15                   | Pimpinellin<br>CAS 131-12-4<br>C <sub>13</sub> H <sub>10</sub> O <sub>5</sub> / 246.215 Da                          | 5,6-Dimethoxy-2H-furo[2,3-h]chromen-2-one                                                                                            | Antibacterial [14, 49]<br>Antifungal [53]<br>Anti-inflammatory [56]<br>$\alpha$ -glucosidase inhibition [60]<br>AChE inhibition [80#, 81, 83*]<br>BChE inhibition [84]^<br>Hemostatic [85] | -                        | # IC <sub>50</sub> = 21.5 $\mu$ M<br>* IC <sub>50</sub> = 0.208 $\mu$ M<br>(= 51.2 $\mu$ g/mL)<br>^ IC <sub>50</sub> = 66.55%<br>(concentr.20 $\mu$ g/mL) | # * ^ Ellman method, and in silico study              |
| 16                   | 3(S)4(R)-Epoxypimpinellin<br>CAS – not available<br>C <sub>13</sub> H <sub>10</sub> O <sub>6</sub> / 262.047 Da     | (3S, 4R)-3,4-epoxy-5,6-dimethoxy-2H-furo[2,3-h]chromen-2-one                                                                         | AChE inhibition [80]                                                                                                                                                                       | -                        | IC <sub>50</sub> = 22.9 $\mu$ M – moderate                                                                                                                | Ellman method                                         |
| DIMERS               |                                                                                                                     |                                                                                                                                      | Biological activity<br>[Ref.]                                                                                                                                                              | Upregulation/Stimulation | Downregulation/Inhibition                                                                                                                                 | Cell/Tissue/Organism                                  |
| Methoxyl groups      |                                                                                                                     |                                                                                                                                      |                                                                                                                                                                                            |                          |                                                                                                                                                           |                                                       |
| 17                   | Moellendorffiline<br>CID: 128785<br>CAS 105099-87-4<br>C <sub>26</sub> H <sub>20</sub> O <sub>10</sub> / 492.431 Da | 11,12,13,14-Tetramethoxy-5a,5b,12b,12c-tetrahydrofuro[2'',3'':7',8']chromeno[4',3':3,4]cyclobuta[1,2-c]furo[2,3-h]chromene-5,6-dione | Antibacterial [14]*<br>Antioxidant [60]#<br>$\alpha$ -glucosidase inhibition [60]^                                                                                                         | -                        | * (MIC=15.6-62.50 $\mu$ g/mL)<br># IC <sub>50</sub> = 0.1 $\mu$ M<br>^ (IC <sub>50</sub> = 17.9 nM)                                                       | * Bacterial strains<br># DPPH assay                   |

| Methoxyl and other alkyl groups |                                                                                                                                                                                             |                                 | Biological activity<br>[Ref.] | Upregulation/Stimulation | Downregulation/Inhibition                                                                                                                       | Cell/Tissue/Animal                                                       |
|---------------------------------|---------------------------------------------------------------------------------------------------------------------------------------------------------------------------------------------|---------------------------------|-------------------------------|--------------------------|-------------------------------------------------------------------------------------------------------------------------------------------------|--------------------------------------------------------------------------|
| <b>18-23</b>                    | Dahuribiethrins A - G<br>CAS – not available<br>A; B; D; E; F; G;<br>C <sub>33</sub> H <sub>31</sub> O <sub>11</sub> / 603.1840;<br>603.1860; 603.1868;<br>603. 1853; 603.1853;<br>603.1850 | Active dahuribiethrins; B, D, E | Anti-inflammatory [13]        | -                        | Inhibition of NO production;<br>IC50 values;<br>B = 9.6 µM<br>D = 8.8 µM<br>E = 9.2 µM<br>(positive control<br>indomethacin;<br>IC50 = 23.6 µM) | In vitro inflammation<br>model in LPS-stimulated<br>RAW264.7 macrophages |

**Abbreviations:** DPPH (2, 2-Diphenyl-1-picrylhydrazyl); ABTS<sup>+</sup> (2, 2'-Azinobis-(3-ethylbenzothiazoline-6-sulfonate) radical cation);

\* CAS numbers, IUPAC names, molecular formula and weight of each MFCs were assessed on-line from Databases; ChemSpider, PubChem, and SciFinder CAS.

The references numbers in the Table S1 are consistent with the numbering in the main text of the manuscript.

Symbols; \*, ^, #, @, !, &, \$ represent connection of the cited references (presenting biological activity studies) and the content in the columns regarding described effects (downregulation/inhibition and/or upregulation/activation) and also with the experimental model used in the study.
